# Supplementary material for: Programmed Self-Assembly of a Biochemical and Magnetic Scaffold to Trigger and Manipulate Microtubule Structures
Source: PubMed Central journal article supplement (PMC5595911; doi:10.1038/s41598-017-10297-y), 2017-09-12
Supplement: 41598_2017_10297_MOESM1_ESM.pdf [file 41598_2017_10297_MOESM1_ESM.pdf]

# Supplementary Information

Programmed Self-Assembly of a Biochemical and Magnetic Scaffold to Trigger  
and Manipulate Microtubule Structures

*Rémi Ducasse\*<sup>1</sup>, Wei-An Wang\*<sup>1</sup>, Marina Garcia-Jove Navarro\*<sup>1</sup>, Nicolas Debons<sup>1</sup>, Alexandra Colin<sup>1</sup>, Jérémy Gautier<sup>1</sup>, Jean-Michel Guigner<sup>2</sup>, François Guyot<sup>2</sup>, and Zoher Gueroui<sup>1</sup>*

<sup>1</sup> École Normale Supérieure, PSL Research University, CNRS, UPMC,  
Department of Chemistry,  
24 rue Lhomond, 75005 Paris, France

<sup>2</sup> IMPMC. Sorbonne Université. CNRS. UPMC. MNHN. IRD.  
4, place Jussieu, 75005 Paris, France

\* R.D, W.A.W, and M.GJ.N contributed equally to this work.

**4 Supplementary figures.**

## Correspondence:

Zoher Gueroui

Phone: +33 1 44 32 24 09

Email: [zoher.gueroui@ens.fr](mailto:zoher.gueroui@ens.fr)

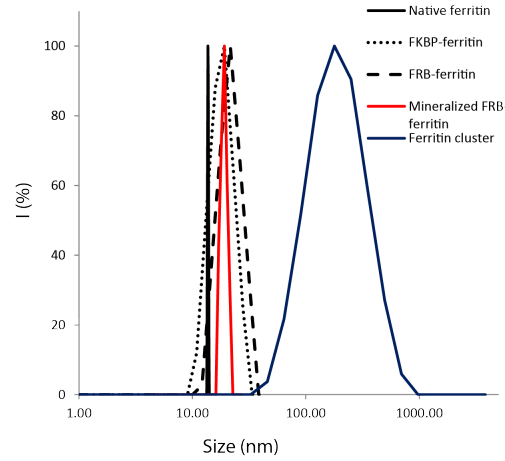

| Protein                  | mean size (nm) <sup>a</sup> | zeta potential (mV) <sup>b</sup> |
|--------------------------|-----------------------------|----------------------------------|
| Native ferritin          | 13.7 ± 0.55                 | -11.4                            |
| FKBP-ferritin            | 18.5 ± 8.5                  | -5.7                             |
| FRB-ferritin             | 21.9 ± 9.8                  | -11.1                            |
| Mineralized FRB-ferritin | 19.1 ± 2.7                  | -1.5                             |
| Ferritin cluster         | 215.1 ± 279.8               | -13.7                            |

**Figure S1.** Size distribution of native ferritin, FKBP-ferritin, FRB-ferritin, mineralized FRB-ferritin and ferritin cluster determined by dynamic light scattering (DLS).

Table: Diameter and zeta potential of native ferritin, FKBP-ferritin, FRB-ferritin, mineralized FRB-ferritin, and ferritin cluster. <sup>a</sup> Mean diameter measured by dynamic light scattering (DLS) and <sup>b</sup> Zeta potential.

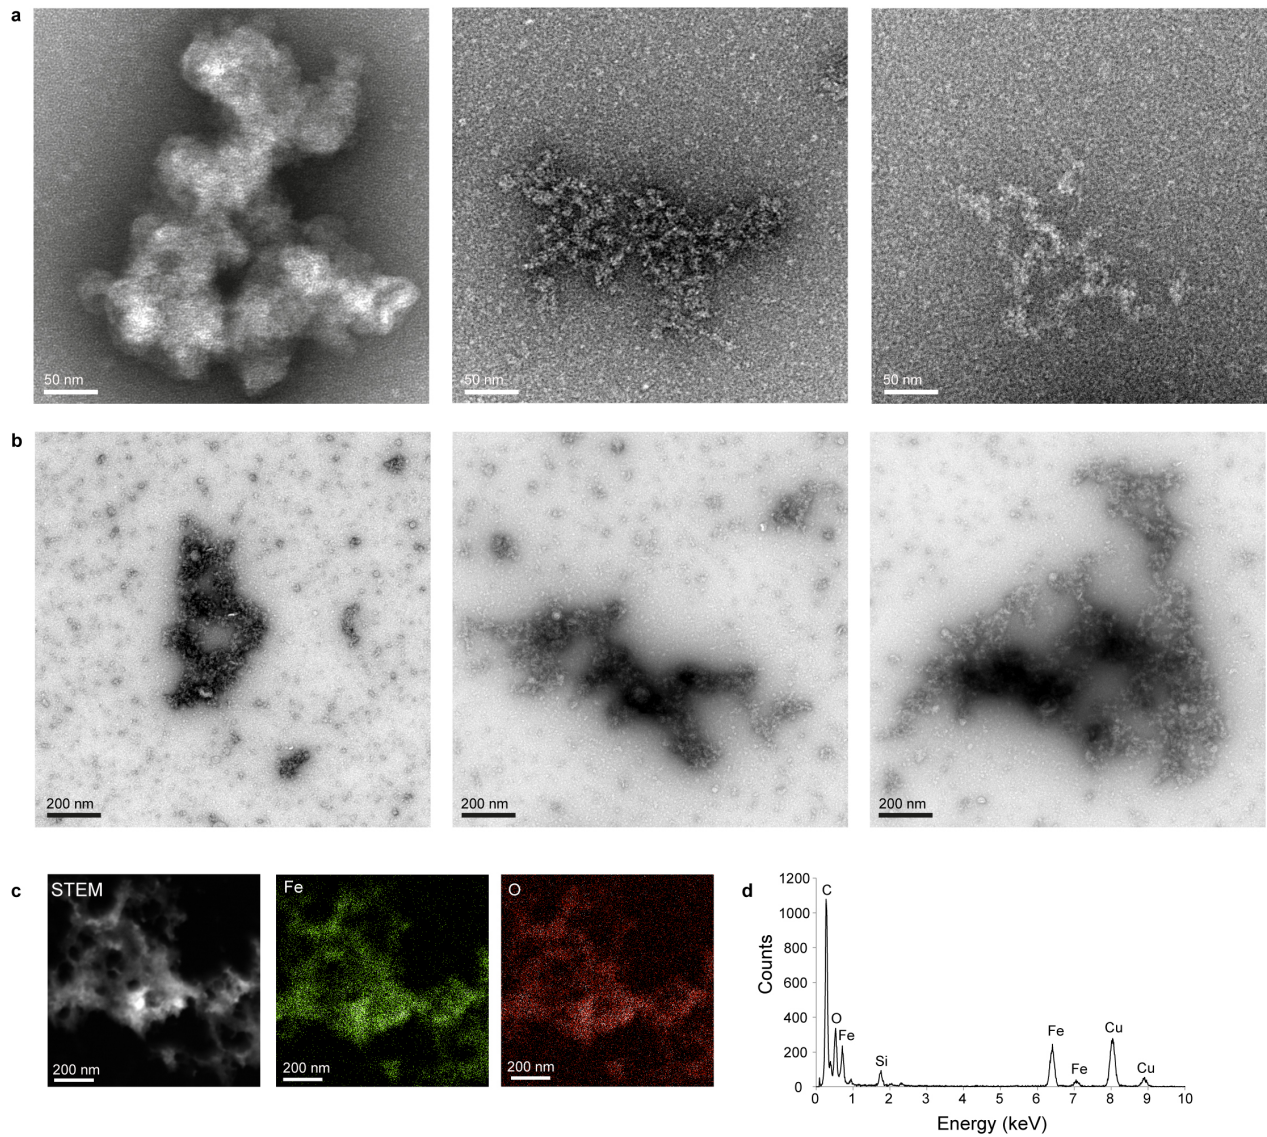

**Figure S2.** Characterization of ferritin assemblies and chemical analysis of biomineralised ferritin clusters: **a,b**, TEM negative staining images of ferritin clusters and mineralized ferritin clusters. **c**, STEM-EDX mapping of the ferritin cluster showing the distribution of Fe (green) and O (red) within the ferritin cluster. **d**, EDX spectrum of the ferritin cluster.

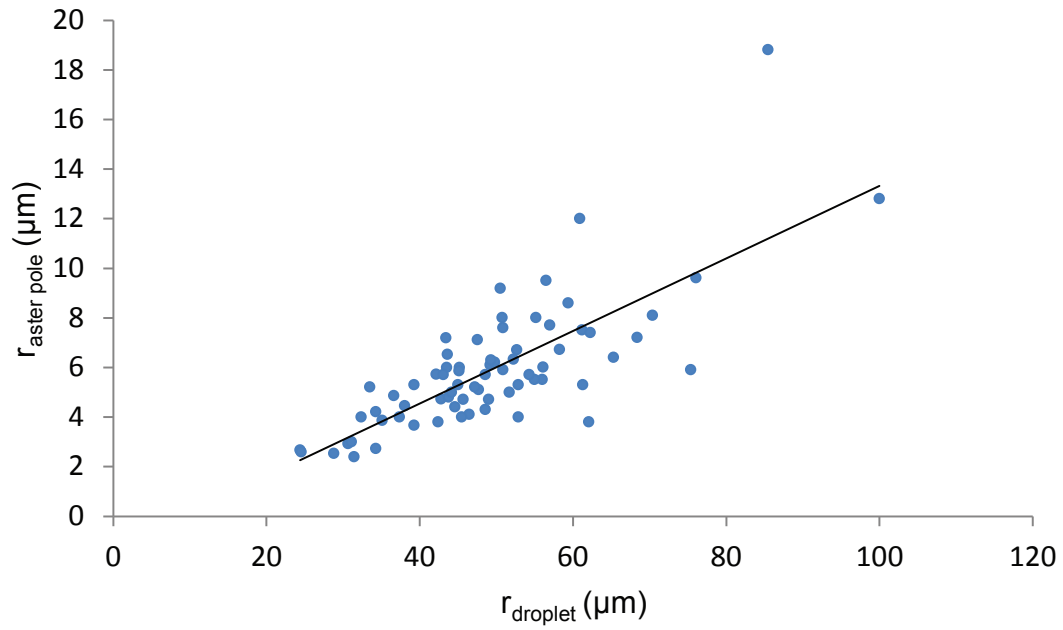

**Figure S3.** Plot of the radius of the aster pole entrapping the clusters of ferritins as a function of the radius of the droplets of egg extracts.

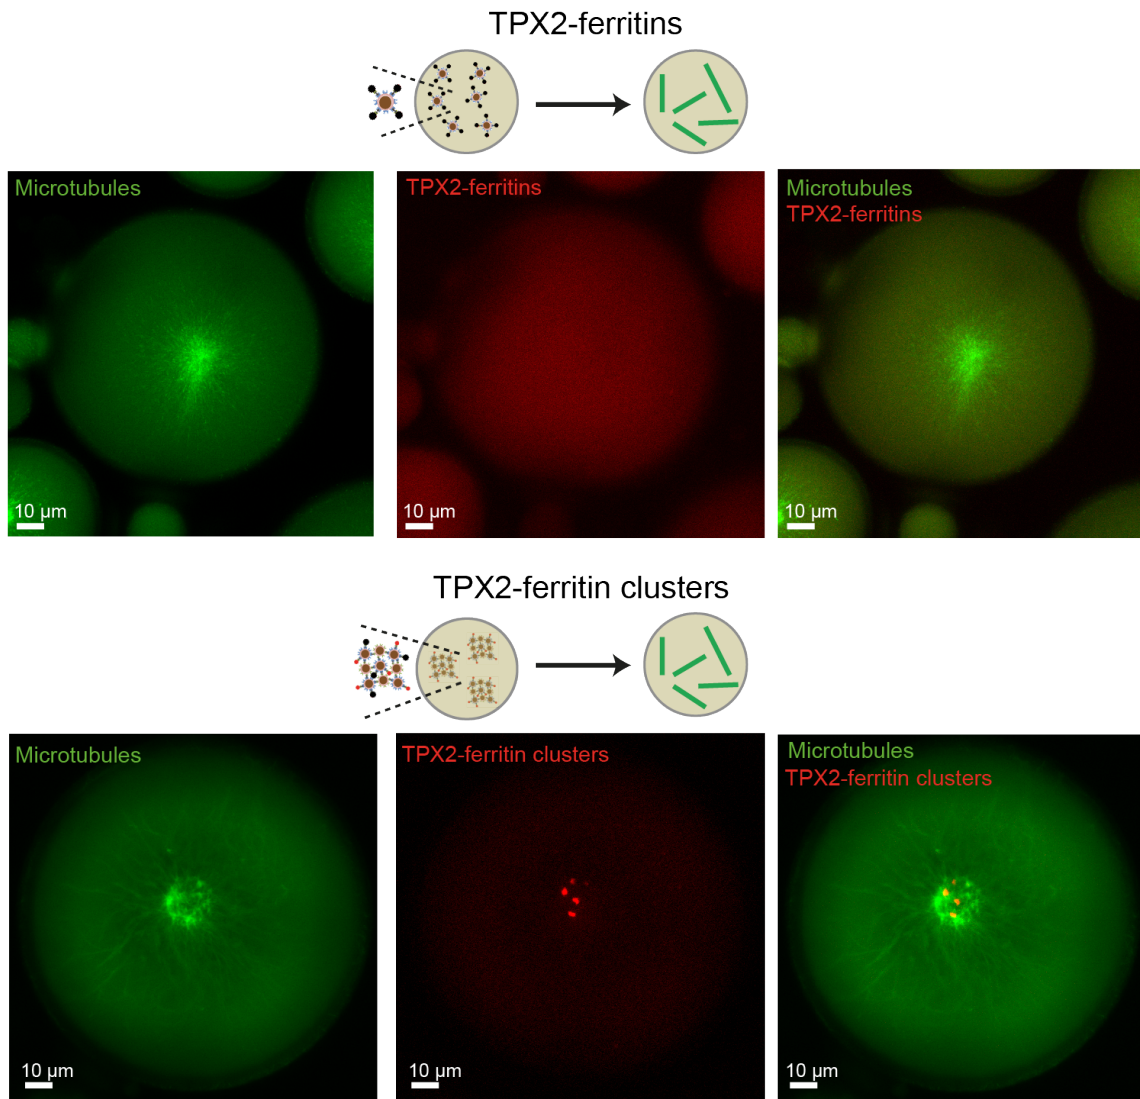

---

**Figure S4.** Confocal observation of microtubule polymerization induced by TPX2-ferritins in a droplet of *Xenopus* egg extract (top: freely diffusing TPX2-ferritins, bottom: clusters of TPX2-ferritins).
